# Supplementary material
Source: PubMed Central journal article supplement (PMC7354212)

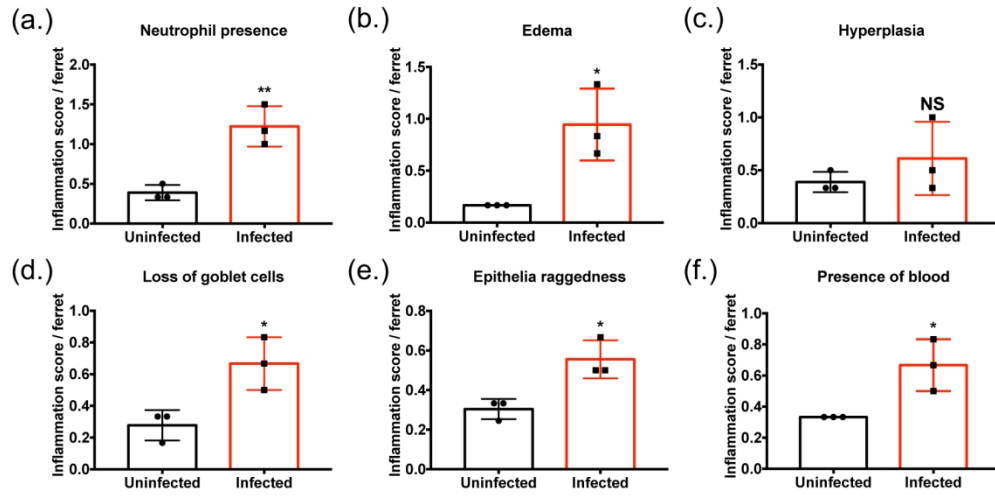

Supplement: NIHMS1586198-supplement-1.pdf [file NIHMS1586198-supplement-1.pdf]
